# Supplementary material for: Graphene oxide/alginate composites as novel bioinks for three-dimensional mesenchymal stem cell printing and bone regeneration applications
Source: Royal Society of Chemistry journal article supplement (doi:10.1039/c9nr07643c), 2019-01-01
Supplement: c9nr07643c1.pdf [file c9nr07643c1.pdf]

Supporting Information

**Graphene oxide/alginate composites as novel bioinks for three-dimensional mesenchymal  
stem cell printing and bone regeneration applications**

*Goeun Choe,<sup>a</sup> Seulgi Oh,<sup>a</sup> Ji Min Seok,<sup>b</sup> Su A Park<sup>b\*</sup> and Jae Young Lee<sup>a \*</sup>*

<sup>a</sup> School of Materials Science and Engineering, Gwangju Institute of Science and Technology (GIST), Gwangju, 61005, Republic of Korea

<sup>b</sup> Department of Nature-Inspired Nanoconvergence Systems, Korea Institute of Machinery and Materials (KIMM), Daejeon 34103, Republic of Korea

\* Corresponding authors: e-mail to [jaeyounglee@gist.ac.kr](mailto:jaeyounglee@gist.ac.kr) (J.Y.L), [psa@kimm.re.kr](mailto:psa@kimm.re.kr) (S.A.P)

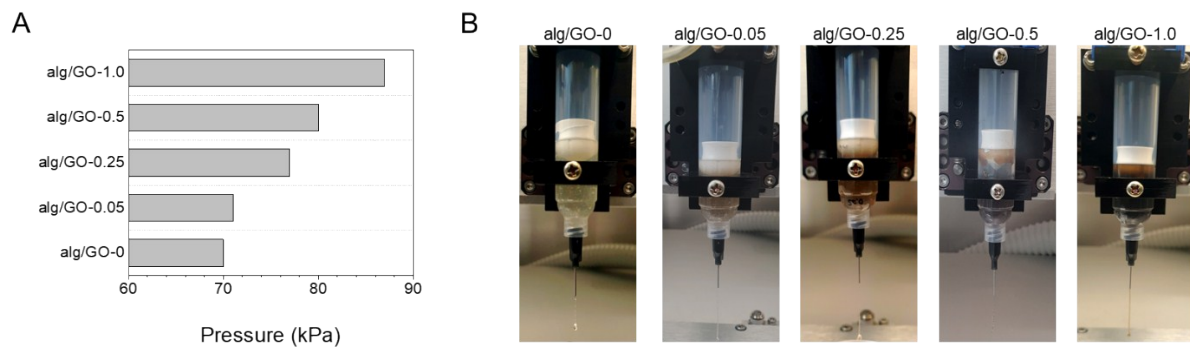

**Figure S1 (A)** Applied pressures for sub-optimal printing with each bioink. **(B)** Photographs during the printing with each bioink.

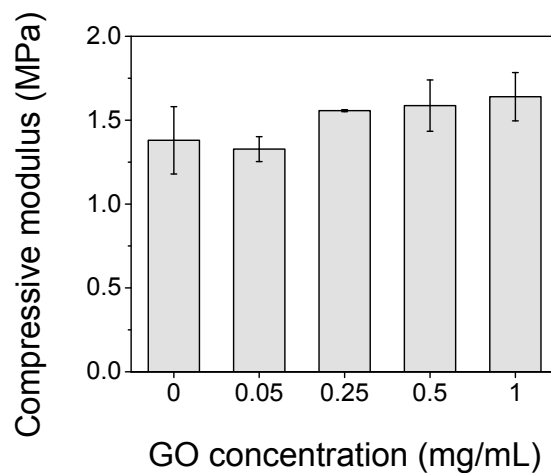

**Figure S2** Compressive moduli of the scaffolds printed with various bioinks.

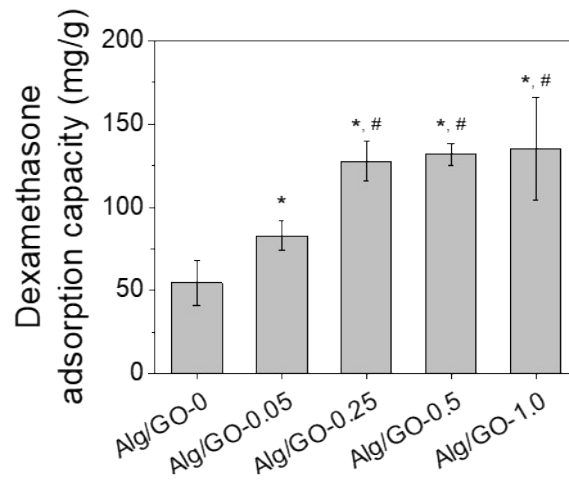

**Figure S3** Dexamethasone adsorption to various Alg/GO scaffolds. \* and # indicate statistical differences compared to alg/GO-0 and alg/GO-0.05, respectively, for 24 h. Individual scaffolds were cut into 5 mm x 5 mm pieces and weighed. Then, the samples were transferred into 0.5 mg/mL dexamethasone solution (in PBS) and at 37°C for 24 h. Then, the absorbance of the solution at 240 nm was measured to analyzed the dexamethasone concentration in the solution and calculate the absorption capacity of each sample.
